# Supplementary material
Source: Springer Nature journal article supplement (http://www.springermedizin.de/resource/supplementary/12955_2004_146_MOESM3_ESM.pdf/9559778)
Supplement: MOESM3 [file 9559778]

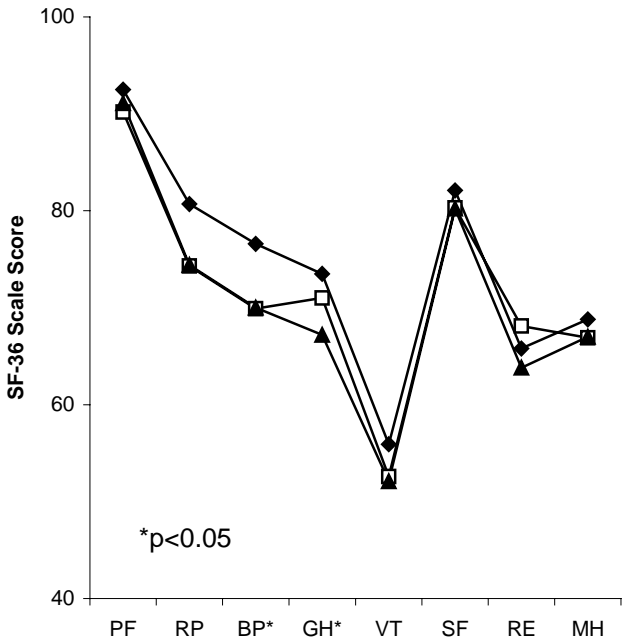

- ◆ A: Only hypersensitivity to defined substances (n=192)
- B: Only allergic diseases (n=268)
- ▲ C: Hypersensitivity AND allergic diseases (n=471)
